# Supplementary material for: Eigen-Epistasis for detecting gene-gene interactions
Source: PubMed Central journal article supplement (PMC5259960; doi:10.1186/s12859-017-1488-0), 2017-01-23

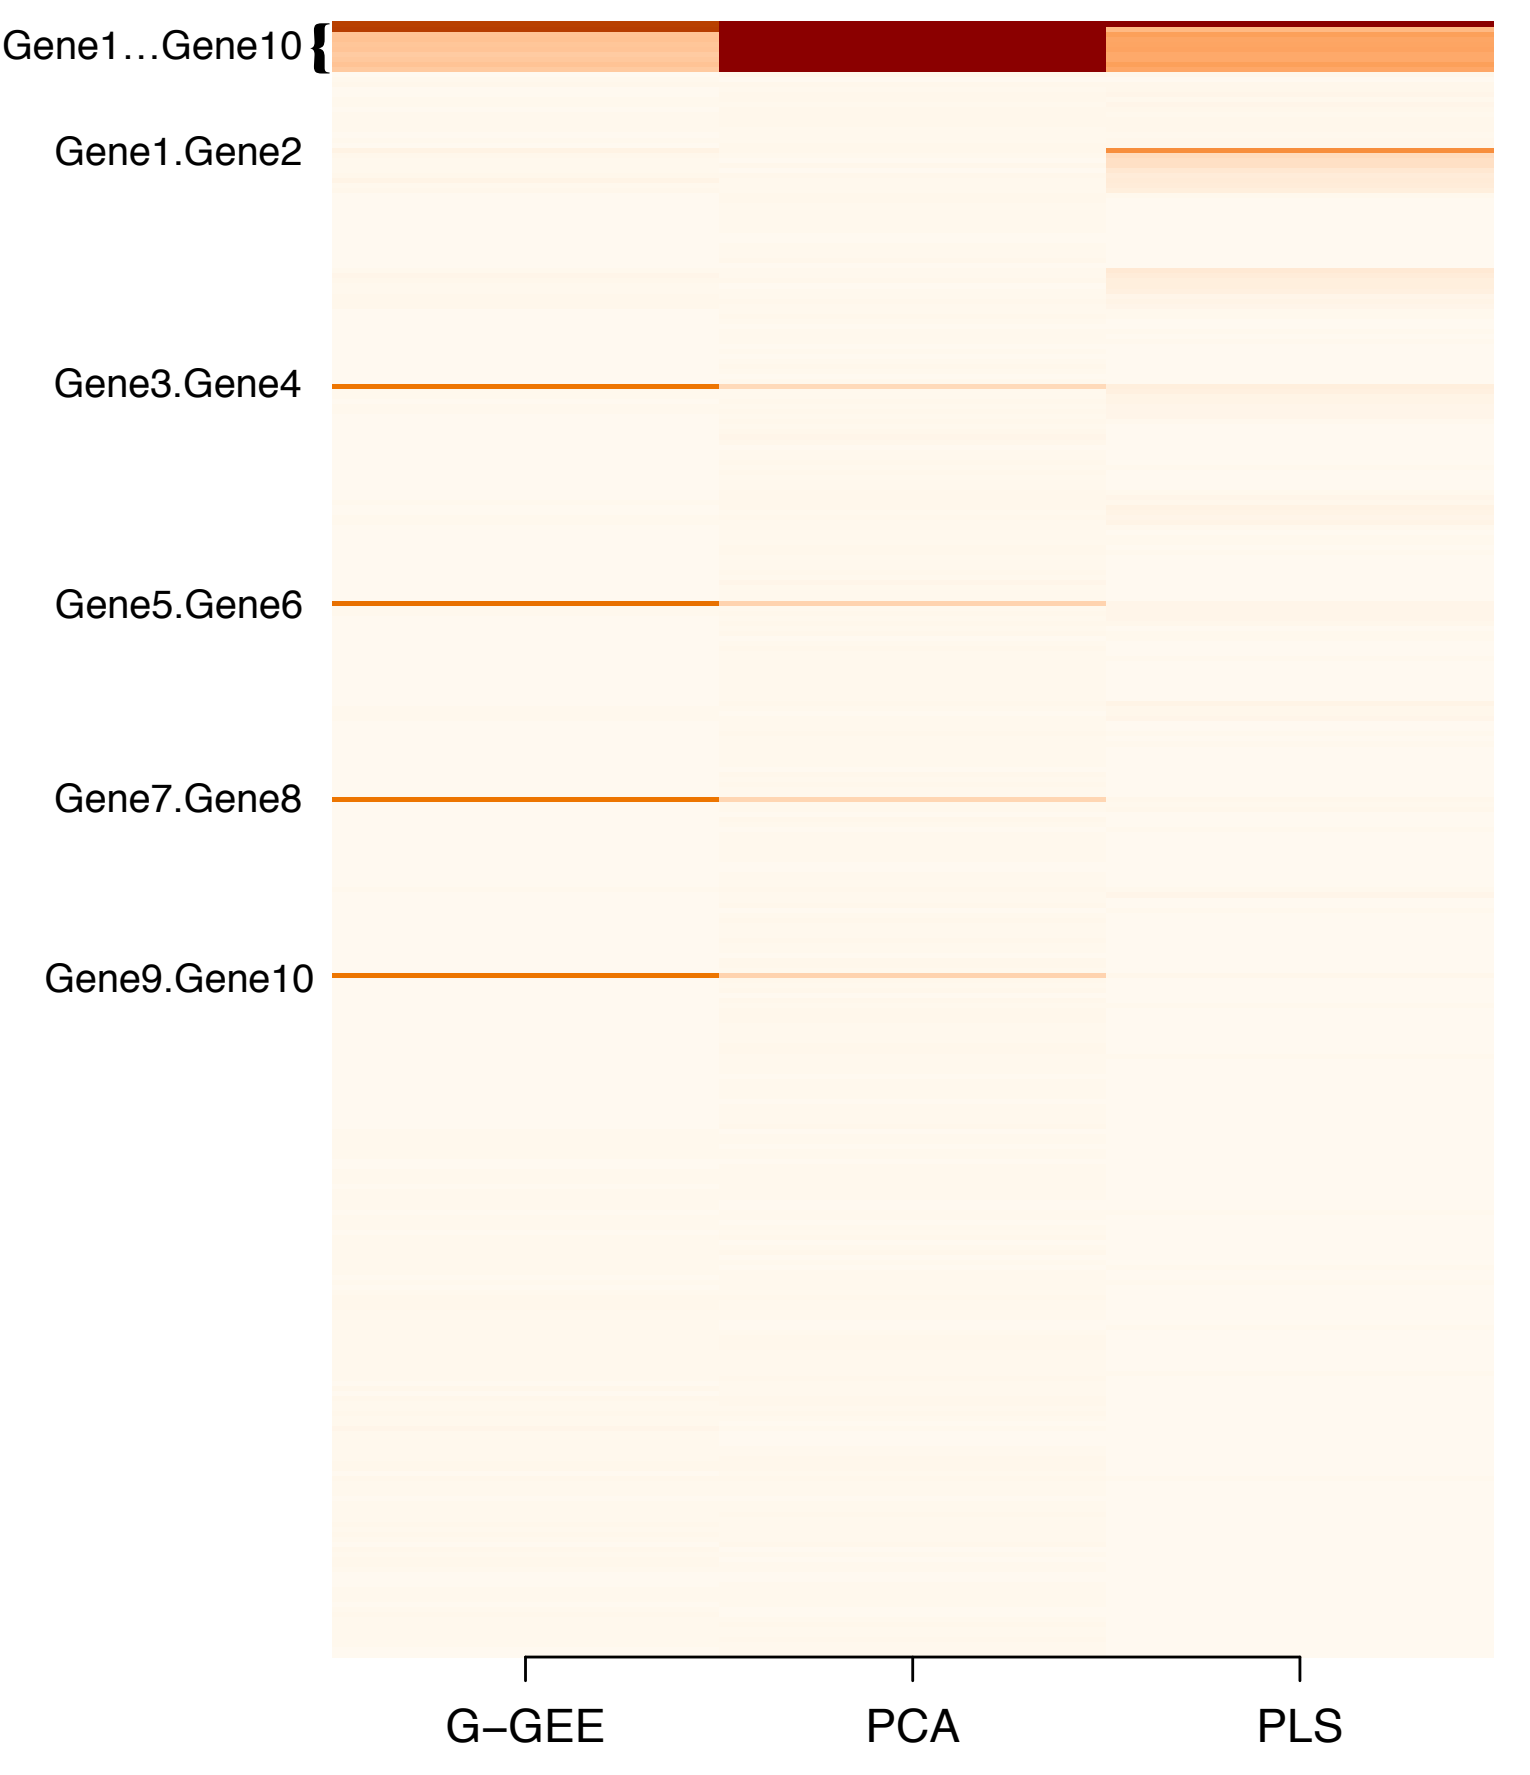

Supplement: 12859_2017_1488_MOESM2_ESM.pdf [file 12859_2017_1488_MOESM2_ESM.pdf]
