# Supplementary material for: Eigen-Epistasis for detecting gene-gene interactions
Source: PubMed Central journal article supplement (PMC5259960; doi:10.1186/s12859-017-1488-0), 2017-01-23
Supplement: 12859_2017_1488_MOESM3_ESM.pdf [file 12859_2017_1488_MOESM3_ESM.pdf]

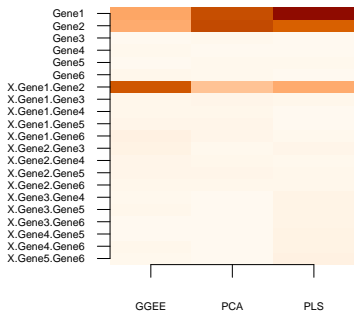

Cadre A ;  $R^2 = 0.4$

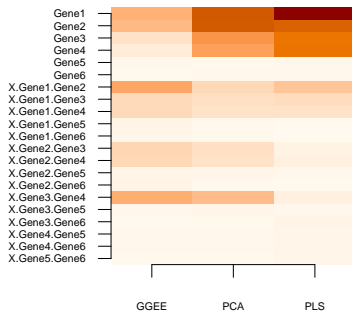

Cadre C ;  $R^2 = 0.4$

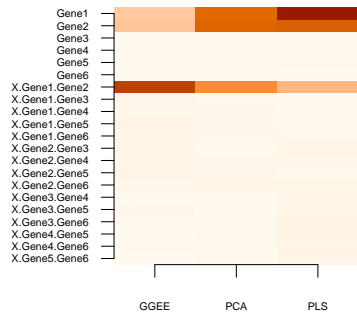

Cadre E ;  $R^2 = 0.4$

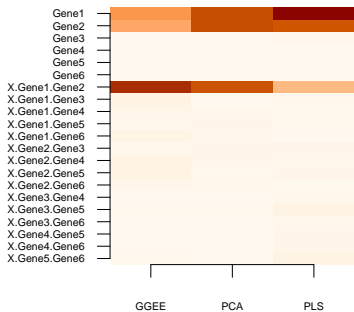

Cadre B ;  $R^2 = 0.4$

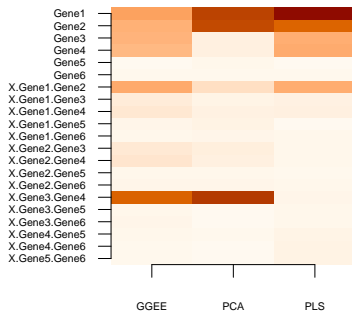

Cadre D ;  $R^2 = 0.4$

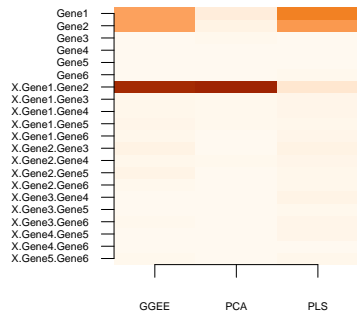

Cadre F ;  $R^2 = 0.4$
