# Supplementary material for: Eigen-Epistasis for detecting gene-gene interactions
Source: PubMed Central journal article supplement (PMC5259960; doi:10.1186/s12859-017-1488-0), 2017-01-23
Supplement: 12859_2017_1488_MOESM4_ESM.pdf [file 12859_2017_1488_MOESM4_ESM.pdf]

Cadre A

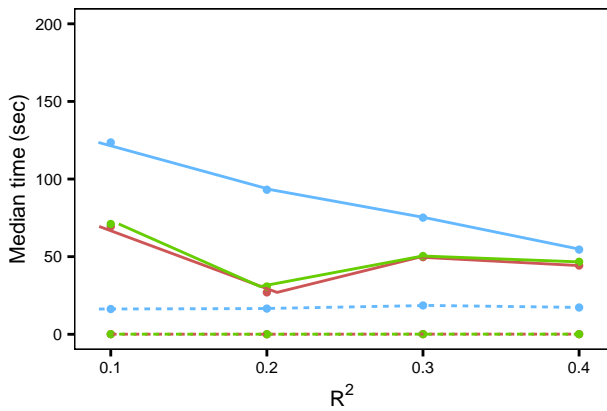

Cadre B

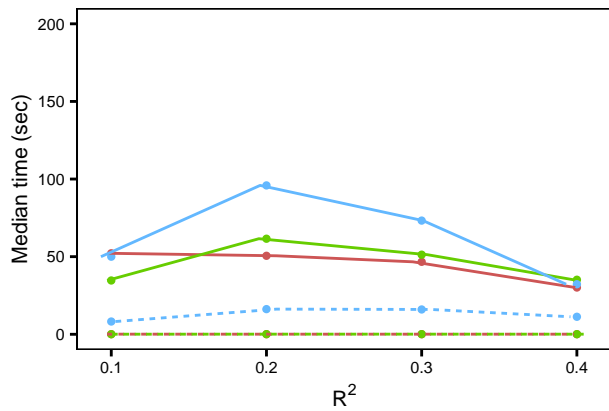

Cadre C

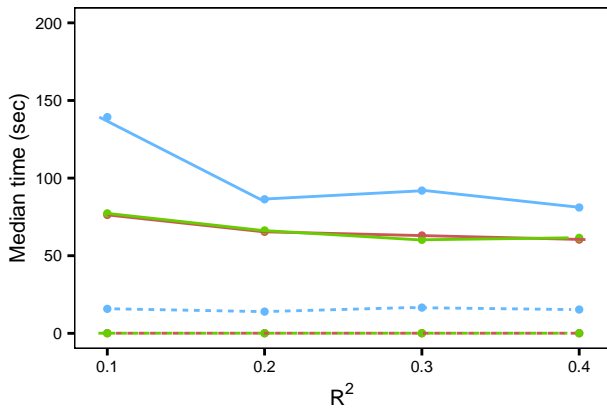

Cadre D

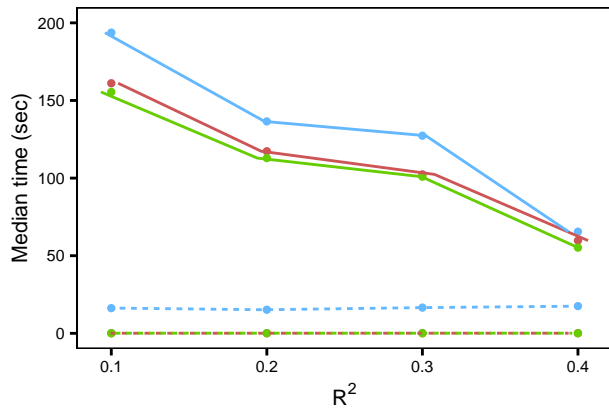

Cadre E

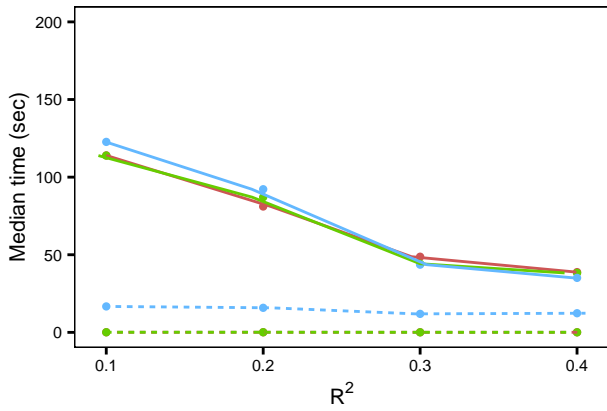

Cadre F

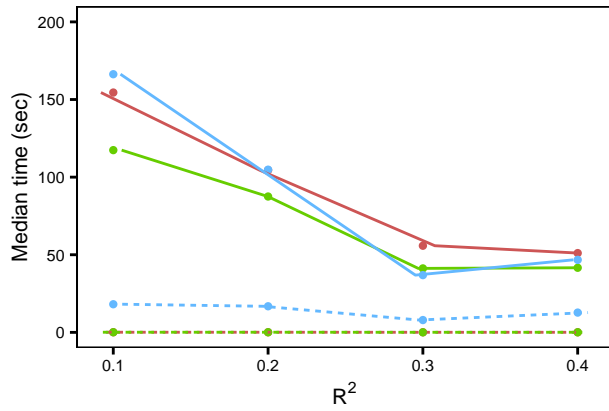

Execution — Group LASSO - - - Interactions modeling

Methods — GEE — PCA — PLS
